# Supplementary material for: The Impact of Genes and Environment on Brain Ageing in Males Aged 51 to 72 Years
Source: Front Aging Neurosci. 2022 Apr 15;14:831002. doi: 10.3389/fnagi.2022.831002 (PMC9051484; doi:10.3389/fnagi.2022.831002)
Supplement: Supplementary file 1 [file Data_Sheet_1.xlsx]

## Sheet: Table S1
Table S1. Numbers of complete & incomplete monozygotic (MZ) &dizygotic (DZ) twin pairs with predicted brain age (PBA) scores at each age interval.
	PBA 51 to 55		PBA 56 to 60		PBA 61 to 65		PBA 66 to 72
Zygosity	Complete	Singletons	Complete	Singletons	Complete	Singletons	Complete	Singletons
MZ	60	20	105	40	98	50	78	51
DZ	40	8	81	30	67	37	51	39

## Sheet: Table S2
Table S2. Predicted brain age (PBA) phenotypic descriptions before & after residualization based on age, ethnicity, scanner & scanner location.
Variables	N	mean	sd	min	max	skew	kurtosis	se
PBA 51 to 55	228	63.0665	6.10461	45.6286	74.1288	-0.531267	-0.341567	0.404288
PBA 56 to 60	442	64.7847	5.19049	35.2198	74.8641	-1.05286	2.16516	0.246886
PBA 61 to 65	417	64.4477	5.78773	42.6209	74.3842	-0.896765	0.51732	0.283426
PBA 66 to 72	348	66.5381	5.29723	42.557	75.5357	-1.7004	3.6786	0.283961
PBA 51 to 55 residualized	228	-0.107879	5.96377	-17.3122	9.85632	-0.564823	-0.273908	0.39496
PBA 56 to 60 residualized	442	0.0963677	4.91058	-25.0573	9.71485	-0.791022	1.22434	0.233572
PBA 61 to 65 residualized	417	-0.0120559	5.5953	-21.3747	9.94393	-0.856057	0.461773	0.274003
PBA 66 to 72 residualized	348	-0.000106191	5.26479	-24.1404	9.06487	-1.65103	3.60822	0.282223

## Sheet: Table S3
Table S3. Predicted brain age (PBA) univariate model fitting results & comparisons.
Variables & Models	ep	-2LL	df	AIC	D-2LL	Ddf	p
PBA 51 to 55
ACE	4	1420.48	224	972.48
AE	3	1423.01	225	973.01	2.54	1	0.111326
CE	3	1427.26	225	977.26	6.78	1	0.00922095
E	2	1530.84	226	1078.84	110.36	2	1.08333e-24
PBA 56 to 60
ACE	4	2620.86	438	1744.86
AE	3	2620.86	439	1742.86	0	1	0.976797
CE	3	2642	439	1764	21.14	1	4.26823e-06
E	2	2710.63	440	1830.63	89.77	2	3.20962e-20
PBA 61 to 65
ACE	4	2581.82	414	1753.82
AE	3	2583.38	415	1753.38	1.57	1	0.21037
CE	3	2596.8	415	1766.8	14.98	1	0.000108664
E	2	2635.63	416	1803.63	53.81	2	2.06687e-12
PBA 66 to 72
ACE	4	2094.31	344	1406.31
AE	3	2094.42	345	1404.42	0.1	1	0.747826
CE	3	2100	345	1410	5.68	1	0.0171363
E	2	2142.82	346	1450.82	48.5	2	2.93286e-11
A = additive genetic, C = common or shared environment, E = non-shared environment, ep = number of estimated parameters, -2LL = -2 x log-likelihood, D-2LL = change in -2 x log-likelihood, Ddf = change in degrees of freedom, AIC = Akaike Information Criteria

## Sheet: Table S4 
Table S4. Predicted brain age (PBA) multivariate model fitting results & comparisons between the saturated ACE correlated factors model (base), and the autoregression, 1- & 2-factor common pathways, & independent pathways sub-models.
Models	ep	-2LL	df	AIC	D-2LL	Ddf	p
ACE correlated factors (base)	34	8096.78	1401	8164.78
Autoregression	18	8127.61	1417	8163.61	30.8262	16	0.0141604
2-factor common pathway	32	8103.2	1405	8167.2	6.41742	4	0.170069
1-factor common pathway	23	8115.54	1413	8161.54	18.7602	12	0.0944818
Independent pathways	28	8120.19	1407	8176.19	23.4104	6	0.000670064
ep = number of estimated parameters, -2LL = -2 x log-likelihood, D-2LL = change in -2 x log-likelihood, Ddf = change in degrees of freedom, AIC = Akaike Information Criteria
The ACE correlated factors is useful for ensuring that the observed variance-covariance structure is positive definitive and for evaluating any potential model misspecification (Neale et al., 2006; Verhulst et al., 2019). Under the correlated factors we observed negative estimates for the shared environmental (C) variance components. Although this could reflect either stochastic variation or gene…

## Sheet: Table S5
Table S5. Predicted brain age (PBA) best fitting multivariate 1-factor common pathway model fitting results & comparisons between the ACE & the AE, CE & E submodels.
Models	ep	-2LL	df	AIC	D-2LL	Ddf	p
ACE	23	8115.54	1413	8161.54
AE	18	8122.41	1418	8158.41	6.86182	5	0.231121
CE	18	8158.55	1418	8194.55	43.0039	5	<0.001
E	13	8291.48	1423	8317.48	175.939	10	<0.001
A = additive genetic, C = common or shared environment, E = non-shared environment, ep = number of estimated parameters, -2LL = -2 x log-likelihood, D-2LL = change in -2 x log-likelihood, Ddf = change in degrees of freedom, AIC = Akaike Information Criteria

## Sheet: Table S6
Table S6. Predicted brain age difference (PBAD) phenotypic correlations (pairwise polyserial).
Variables	1	2	3	4
1. PBAD 51 to 55	1
2. PBAD 56 to 60	0.69	1
3. PBAD 61 to 65	0.77	0.74	1
4. PBAD 66 to 72	0.65	0.71	0.75	1

## Sheet: Table S7
Table S7. Predicted brain age difference (PBAD) univariate model fitting results & comparisons along with standardized variance components and 95% confidence intervals components for the best-fitting additive genetic (A) & non-shared environment (E) univariate models.
Variables & Models	ep	-2LL	df	AIC	D-2LL	Ddf	p		A	C	E
PBAD 51 to 55
ACE	4	1409.46	224	1417.46
AE	3	1410.89	225	1416.89	1.43501	1	0.230949		0.64 (0.55-0.71)	-	0.36 (0.29-0.45)
CE	3	1416.76	225	1422.76	7.30418	1	0.00687945
E	2	1508.95	226	1512.95	99.4924	2	2.48598e-22
PBAD 56 to 60
ACE	4	2582.63	438	2590.63
AE	3	2582.93	439	2588.93	0.306642	1	0.579748		0.71 (0.61-0.79)	-	0.21 (0.21-0.39)
CE	3	2602.73	439	2608.73	20.1002	1	7.34874e-06
E	2	2658.57	440	2662.57	75.9472	2	3.22303e-17
PBAD 61 to 65
ACE	4	2569.07	413	2577.07
AE	3	2570.27	414	2576.27	1.19839	1	0.273643		0.59 (0.46-0.69)	-	0.41 (0.31-0.54)
CE	3	2583.11	414	2589.11	14.0429	1	0.000178685
E	2	2624.1	415	2628.1	55.0279	2	1.12418e-12
PBAD 66 to 72
ACE	4	2086.28	344	2094.28
AE	3	2086.52	345	2092.52	0.246075	1	0.619853		0.60 (0.46-0.68)	-	0.40 (0.32-0.54)
CE	3	2092.28	345	2098.28	6.0021	1	0.0142889
E	2	2132.94	346	2136.94	46.6667	2	7.35271e-11
A = additive genetic, C = common or shared environment, E = non-shared environment, ep = number of estimated parameters, -2LL = -2 x log-likelihood, D-2LL = change in -2 x log-likelihood, Ddf = change in degrees of freedom, AIC = Akaike Information Criteria

## Sheet: Table S8
Table S8. Predicted brain age difference (PBAD) multivariate model fitting results & comparisons between the saturated ACE correlated factors model (base), and the autoregression, 1- & 2-factor common pathways, & independent pathways sub-models.
Models	ep	-2LL	df	AIC	D-2LL	Ddf	p
ACE correlated factors (base)	34	8092.37	1401	8160.37
Autoregression	18	8121.29	1417	8157.29	28.9169	16	0.0245025
2-factor common pathway	32	8098.24	1405	8162.24	5.86514	4	0.209449
1-factor common pathway	23	8109.47	1413	8155.47	17.1007	12	0.145848
Independent pathways	28	8113.51	1407	8169.51	21.1434	6	0.00172888
ep = number of estimated parameters, -2LL = -2 x log-likelihood, D-2LL = change in -2 x log-likelihood, Ddf = change in degrees of freedom, AIC = Akaike Information Criteria

## Sheet: Table S9
Table S9. Predicted brain age difference (PBAD) multivariate model fitting results & comparisons between the best fitting ACE 1-factor common pathway model and the AE, CE & E sub-models.
Models	ep	-2LL	df	AIC	D-2LL	Ddf	p
ACE	23	8109.47	1413	8155.47
AE	18	8115.11	1418	8151.11	5.63435	5	0.343438
CE	18	8151.42	1418	8187.42	41.9488	5	6.03263e-08
E	13	8283.7	1423	8309.7	174.231	10	3.6852e-32
A = additive genetic, C = common or shared environment, E = non-shared environment, ep = number of estimated parameters, -2LL = -2 x log-likelihood, D-2LL = change in -2 x log-likelihood, Ddf = change in degrees of freedom, AIC = Akaike Information Criteria

## Sheet: Table S10
Table S10. Predicted brain age difference (PBAD) additive genetic (below diagonal) & non-shared environmental latent factor correlations based on the best fitting AE 1-factor common pathway model.
Variables	1	2	3	4
1. PBAD 51 to 55	1	0.49	0.46	0.47
2. PBAD 56 to 60	0.81	1	0.55	0.57
3. PBAD 61 to 65	0.93	0.87	1	0.54
4. PBAD 66 to 72	0.82	0.78	0.9	1
